# Supplementary material for: Dynamic perspectives on biodiversity quantification: beyond conventional metrics
Source: PeerJ. 2024 Oct 9;12:e17924. doi: 10.7717/peerj.17924 (PMC11470763; doi:10.7717/peerj.17924)
Supplement: Supplemental Information 2 [file peerj-12-17924-s002.xlsx]

## Sheet: Sheet1
New scenario: large but proporational increase between time periods
Simpson	ni				total ind.		Shannon	ni				total ind.
t1	20	15	25	10	70		t1	20	15	25	10	70
t2	200	150	250	100	700		t2	200	150	250	100	700
								pi				-sum
n(n-1)	380	210	600	90	0.73499			-0.357932	-0.330095	-0.367721	-0.277987	1.33374
n(n-1)	39800	22350	62250	9900	0.725526			-0.357932	-0.330095	-0.367721	-0.277987	1.33374
					-0.00946339	diff						0	diff
New scenario (optional, probably not needed): large but proportional decrease between time periods
Simpson	ni				total ind.		Shannon	ni				total ind.
t1	200	150	250	100	700		t1	200	150	250	100	700
t2	20	15	25	10	70		t2	20	15	25	10	70
								pi				-sum
n(n-1)	39800	22350	62250	9900	0.725526			-0.357932	-0.330095	-0.367721	-0.277987	1.33374
n(n-1)	380	210	600	90	0.73499			-0.357932	-0.330095	-0.367721	-0.277987	1.33374
					0.00946339	diff						0	diff
